# Supplementary material
Source: ML conference proceedings conference paper supplement (https://openreview.net/forum?id=jGXTx64gal)
Supplement: supplementary_material [file Figure8.pdf › img/Figure8.pdf]

Average Accuracy

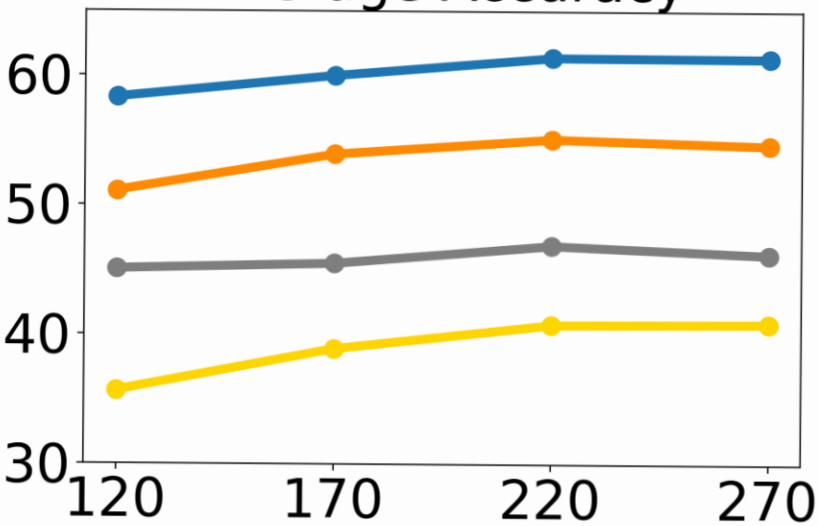

Worst Accuracy

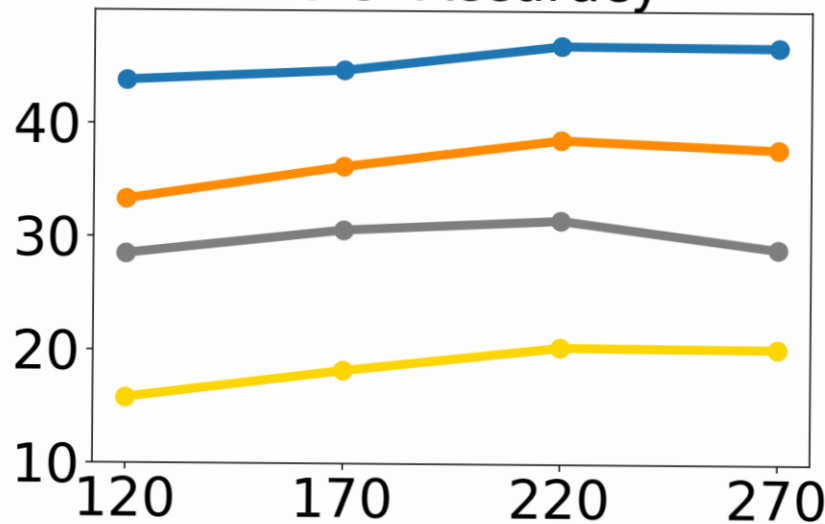

NSD

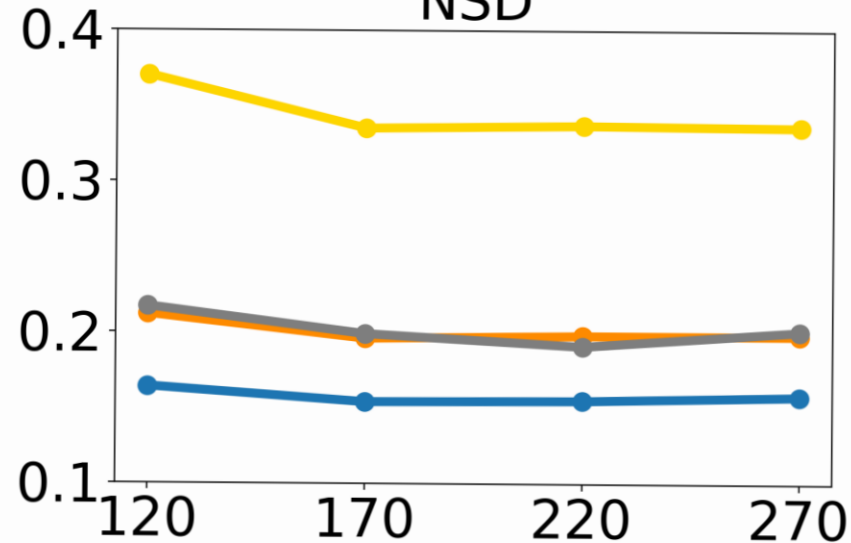

Legend: FGSM (blue line), PGD (orange line), CW (gray line), AA (yellow line).
