# Supplementary material
Source: ML conference proceedings conference paper supplement (https://openreview.net/forum?id=jGXTx64gal)

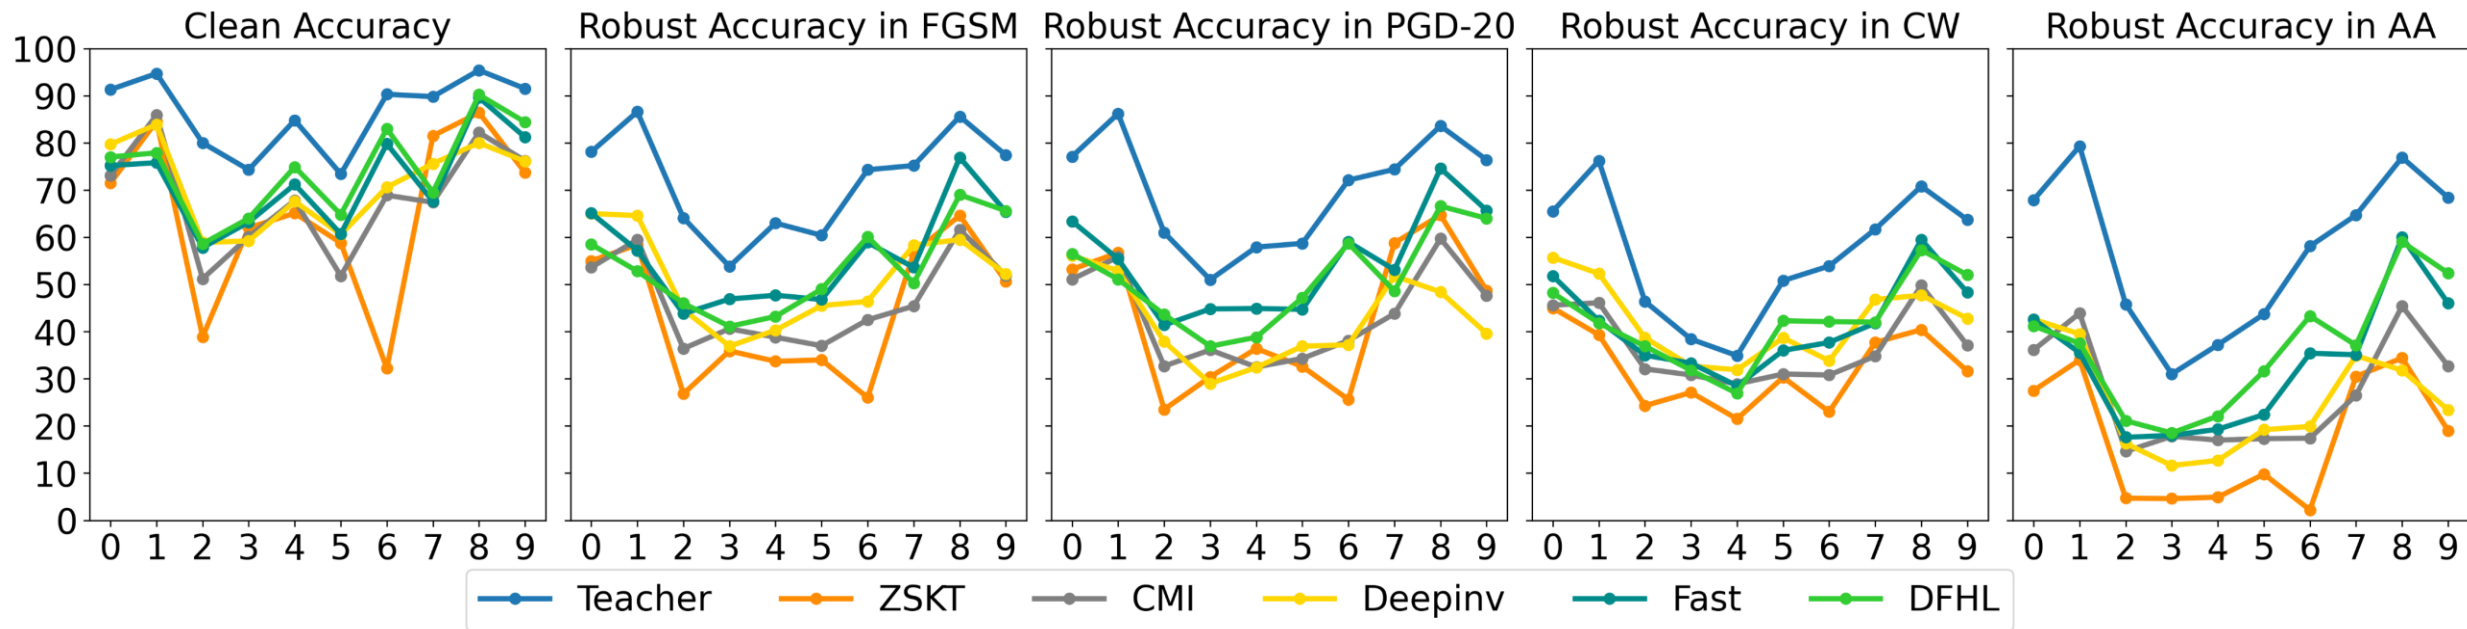

Supplement: supplementary_material [file Figure1.pdf › img/Figure1.pdf]

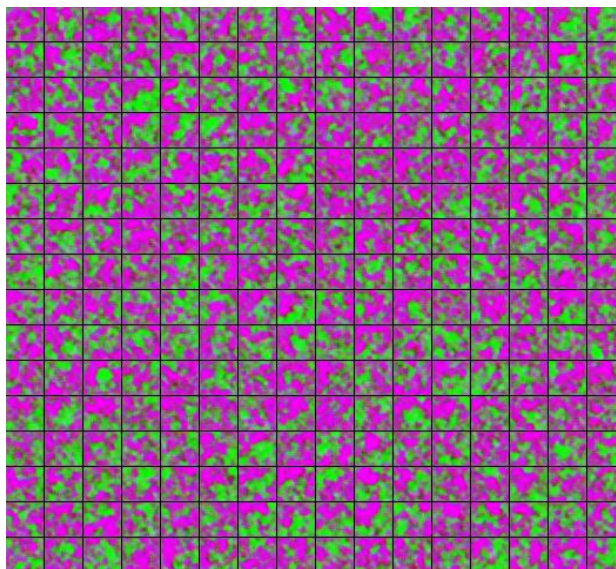

(a) ZSKT

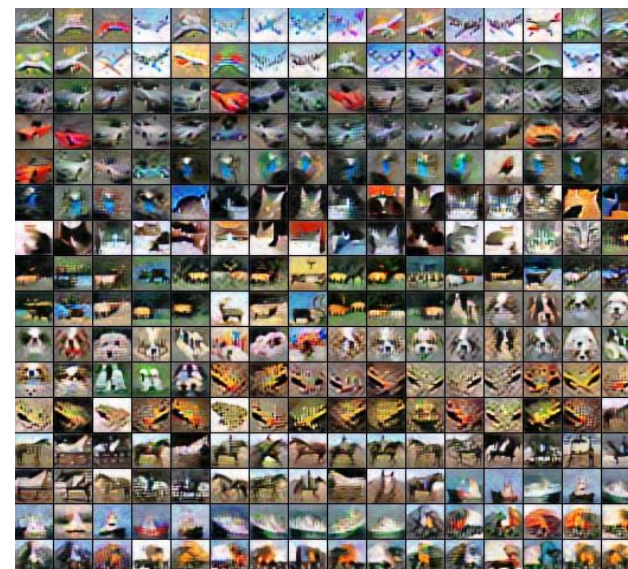

(b) CMI

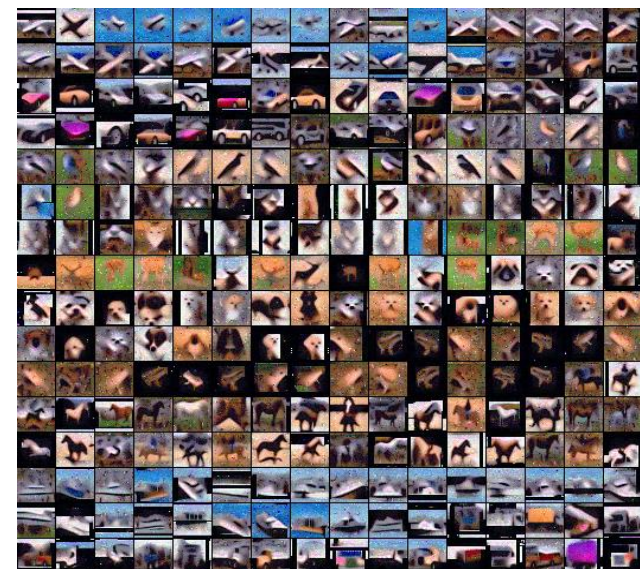

(c) DeepInv

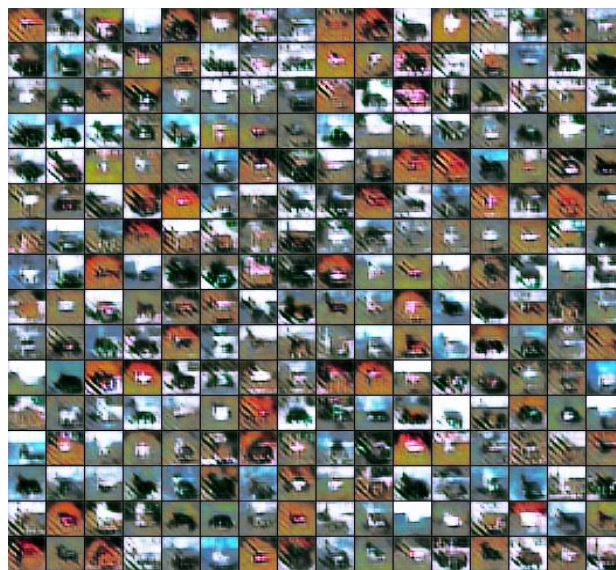

(d) Fast

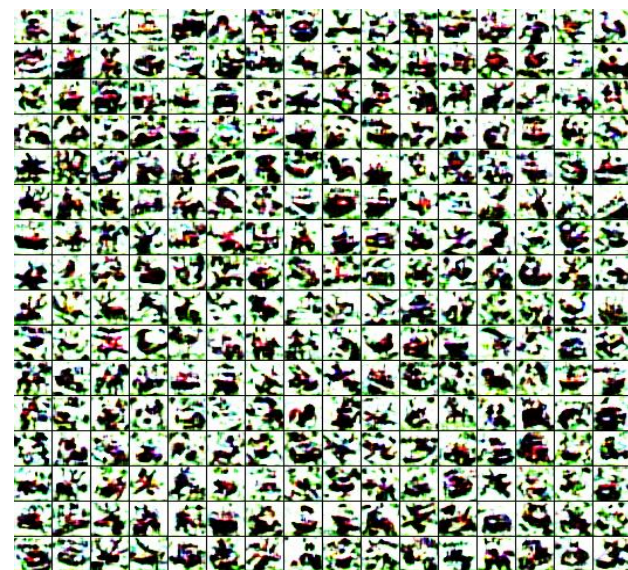

(e) DFHL

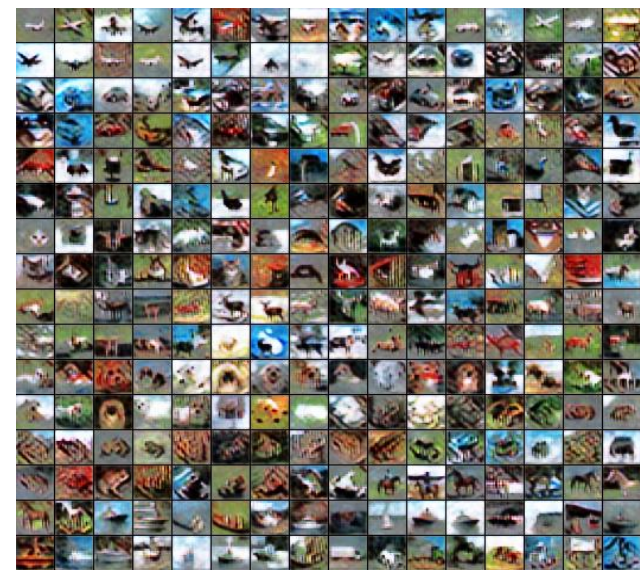

(f) FERD(Ours)

Supplement: supplementary_material [file Figure10.pdf › img/Figure10.pdf]

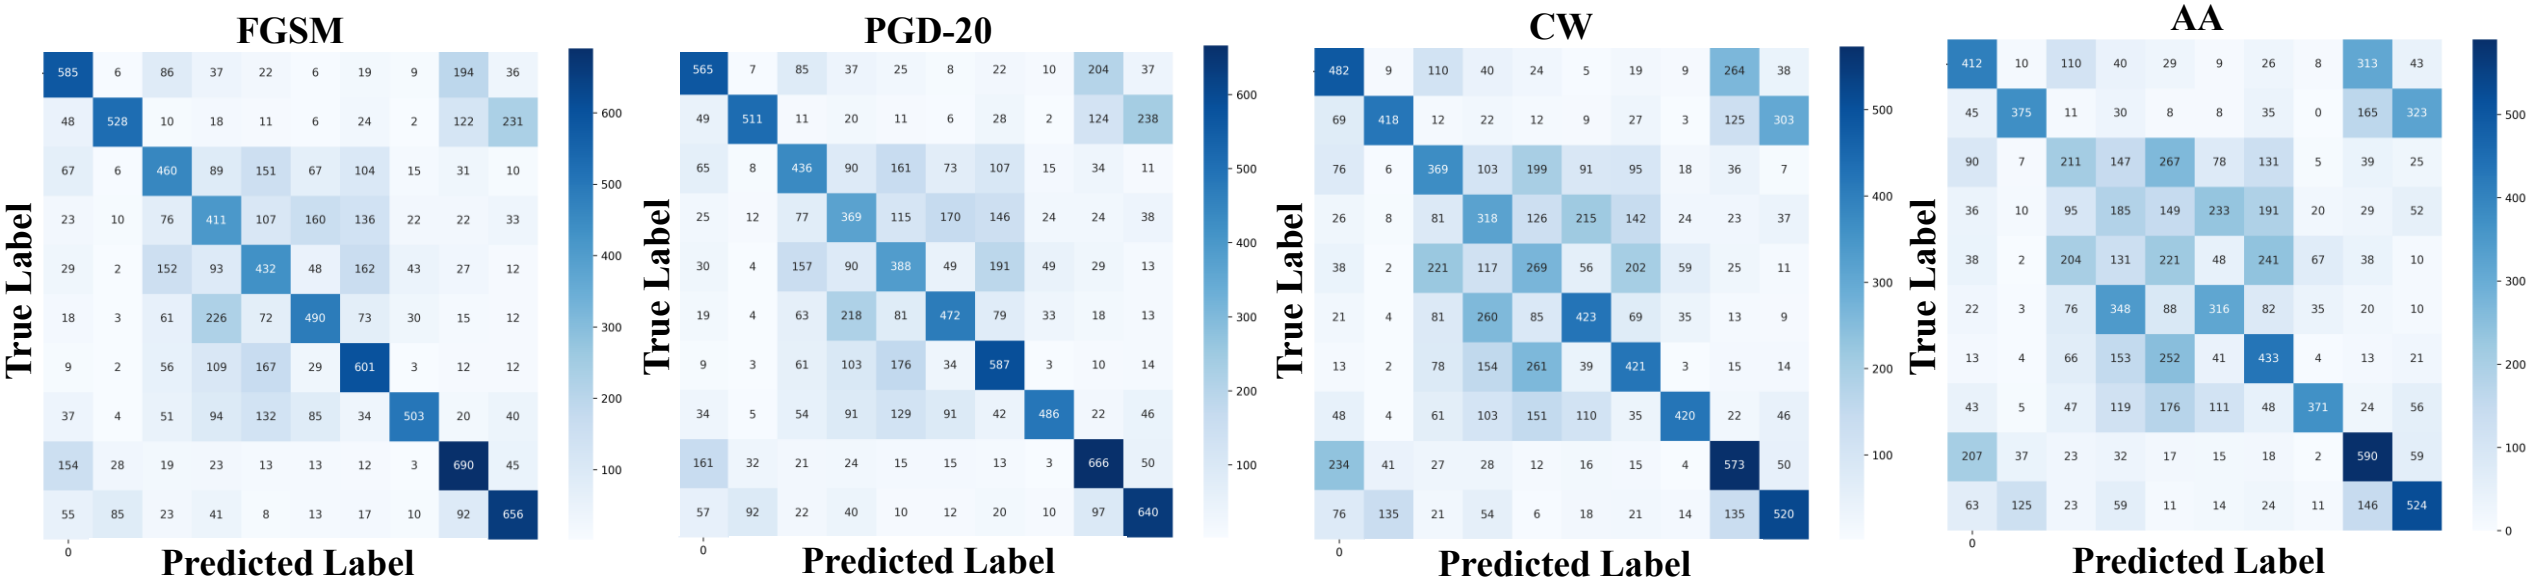

Supplement: supplementary_material [file Figure2.pdf › img/Figure2.pdf]

## Phase 1: Generation Stage

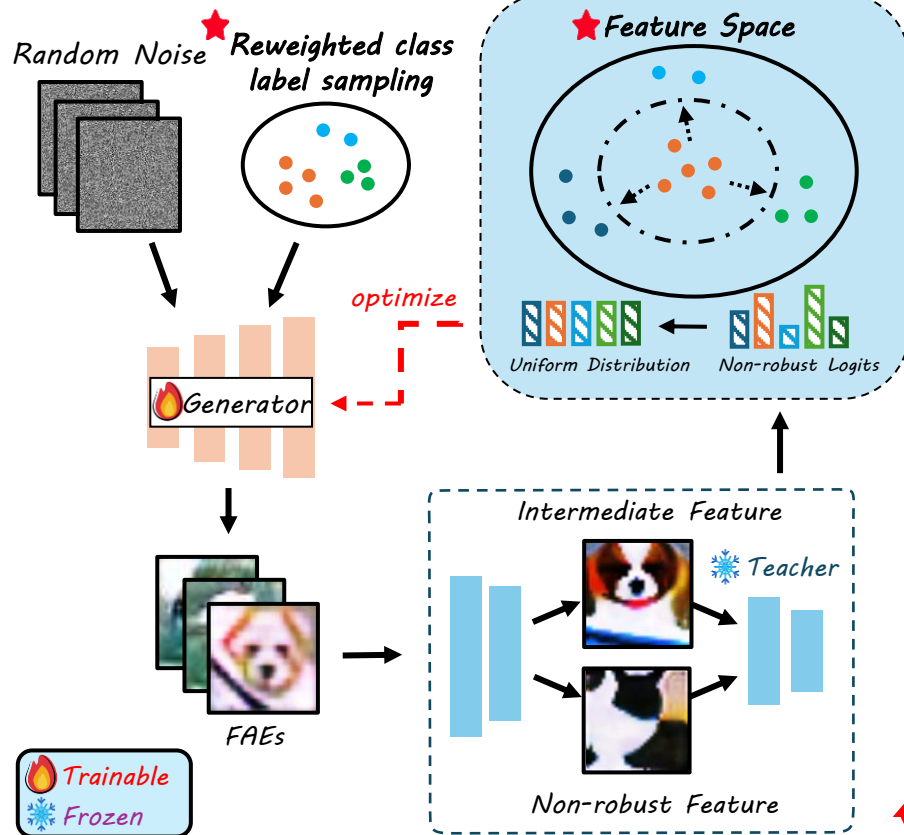

## Phase 2: Robustness Distillation Stage

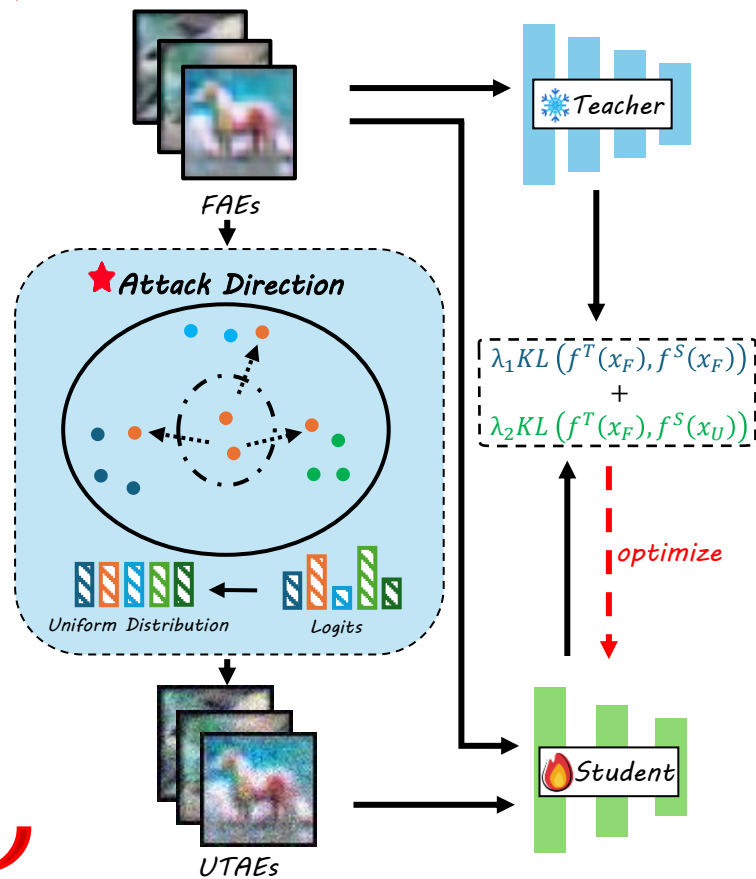

Supplement: supplementary_material [file Figure3.pdf › img/Figure3.pdf]

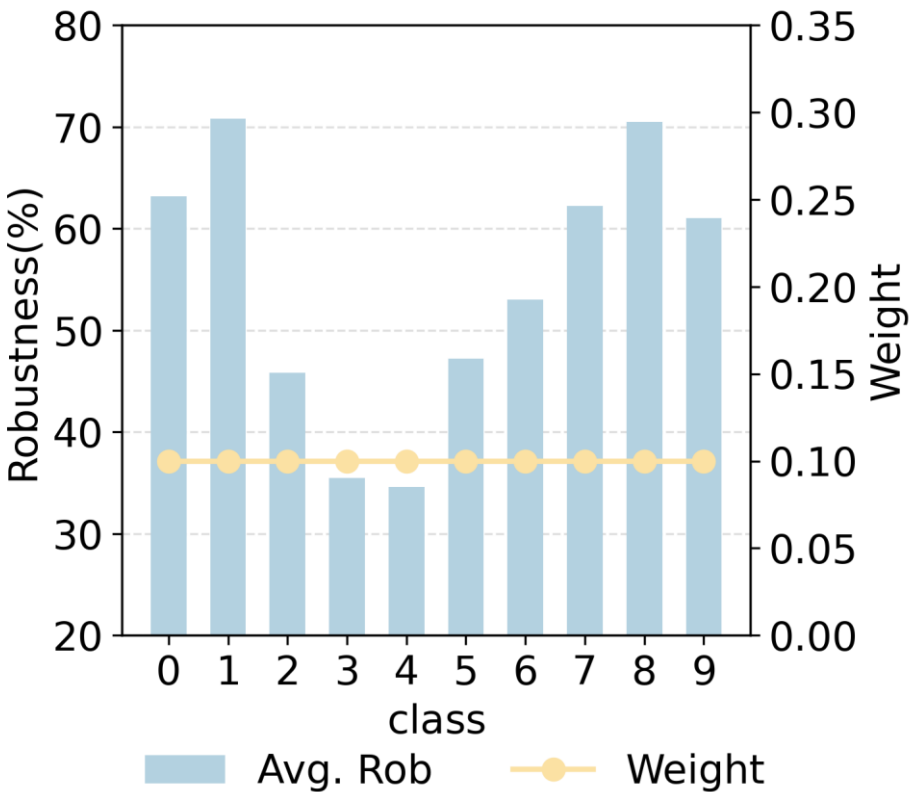

(a)

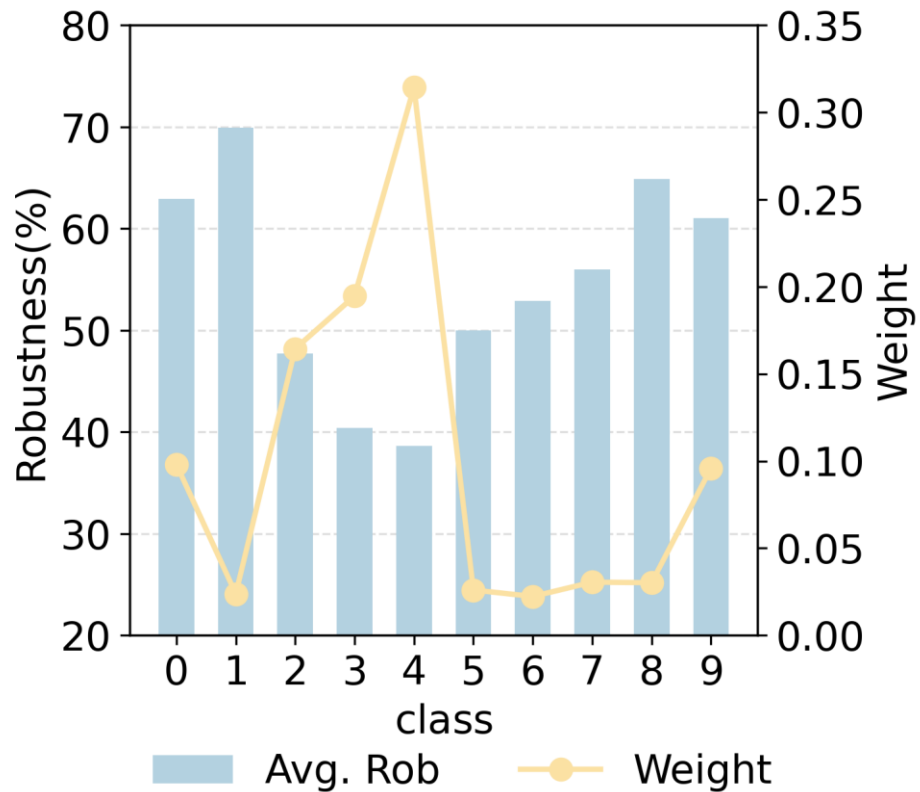

(b)

Supplement: supplementary_material [file Figure4.pdf › img/Figure4.pdf]

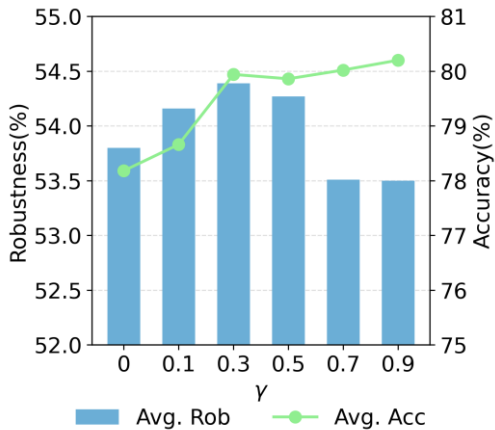

(a)

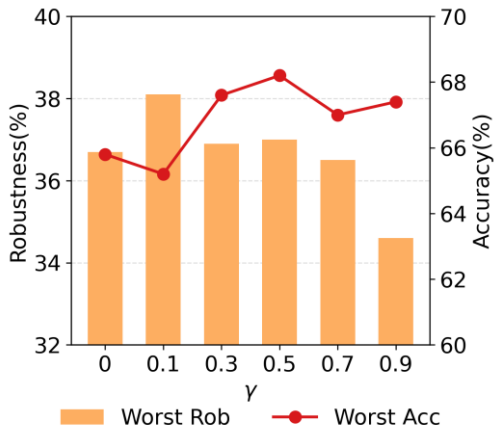

(b)

Supplement: supplementary_material [file Figure5.pdf › img/Figure5.pdf]

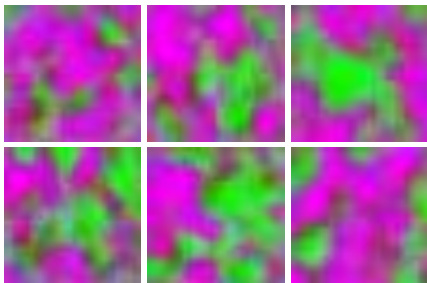

(a) ZSKT

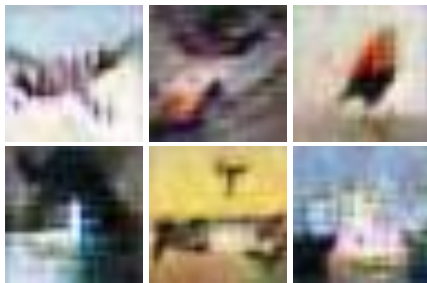

(b) CMI

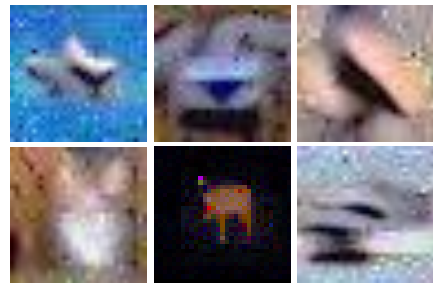

(c) DeepInv

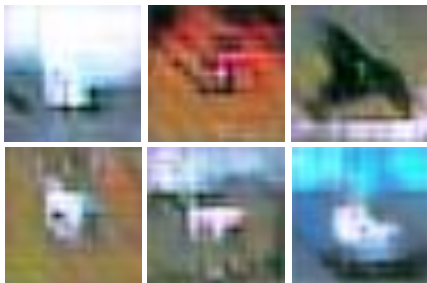

(d) Fast

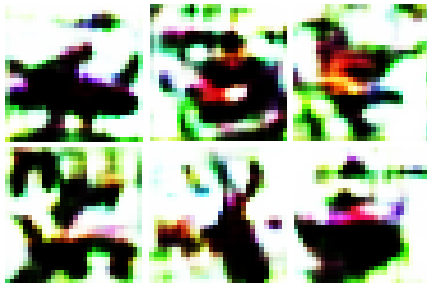

(e) DFHL

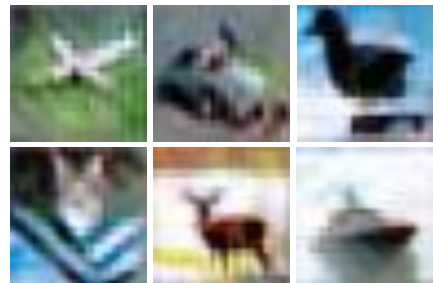

(f) FERD

Supplement: supplementary_material [file Figure6.pdf › img/Figure6.pdf]

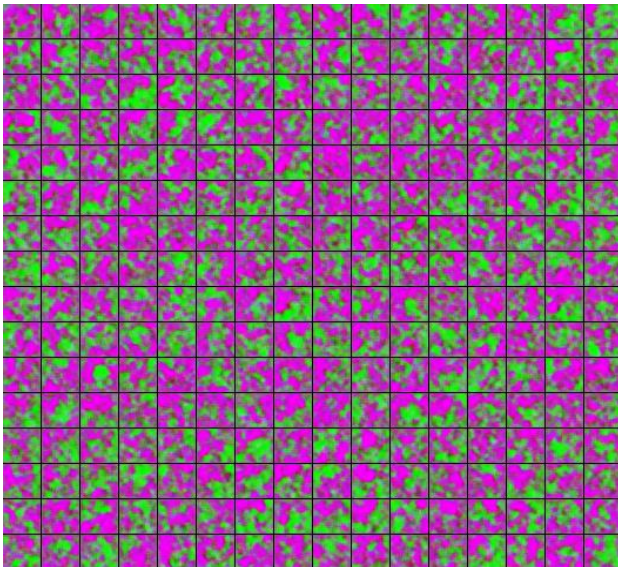

(a) ZSKT

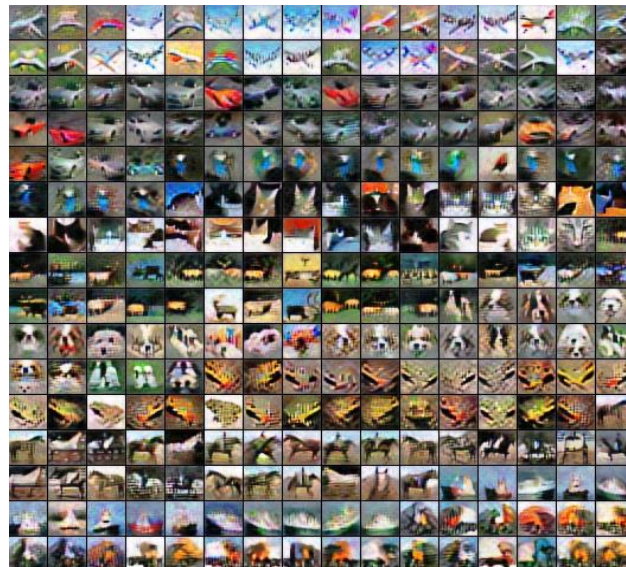

(b) CMI

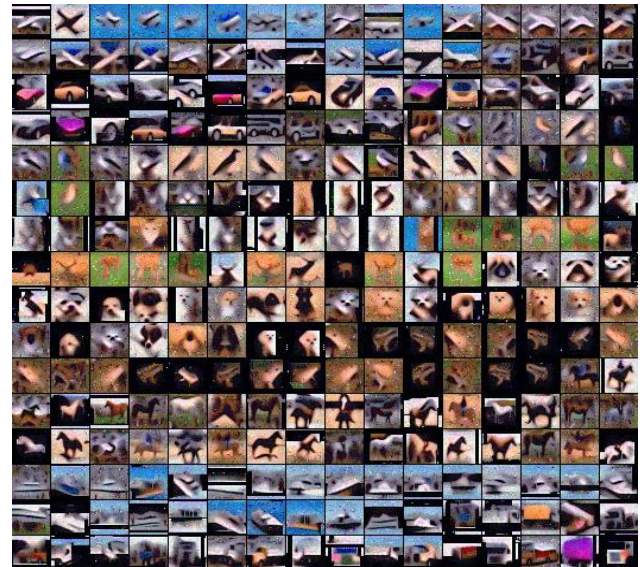

(c) DeepInv

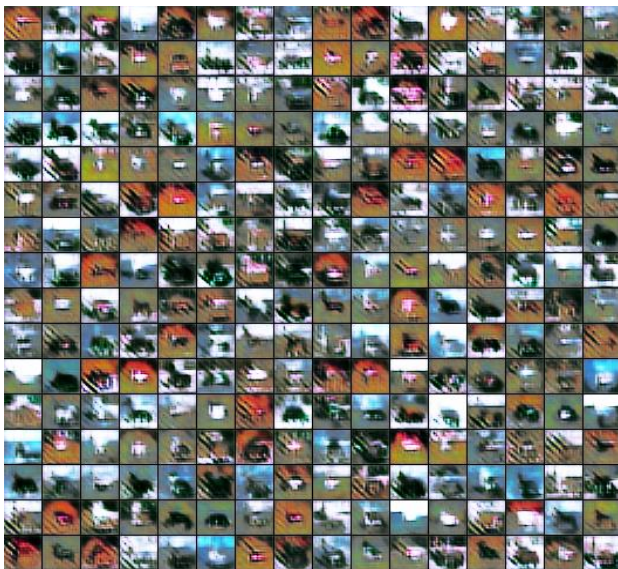

(d) Fast

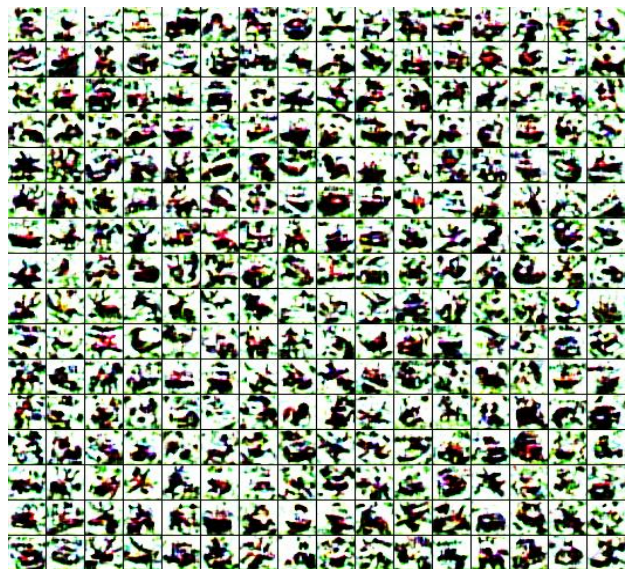

(e) DFHL

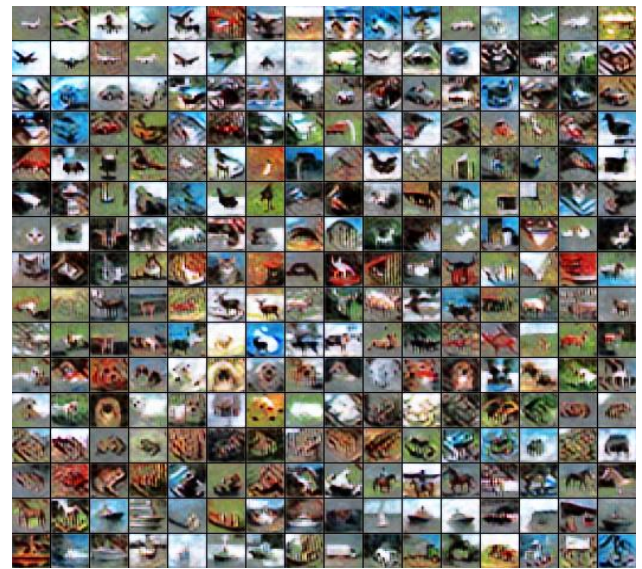

(f) FERD(Ours)

Supplement: supplementary_material [file Figure7.pdf › img/Figure7.pdf]

True Label

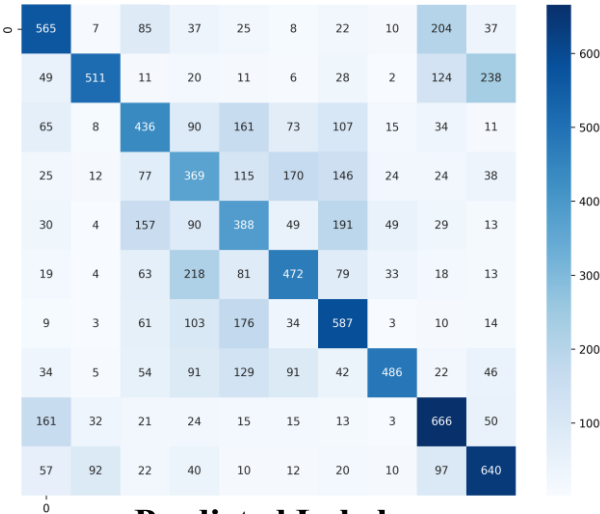

Predicted Label

(a)

True Label

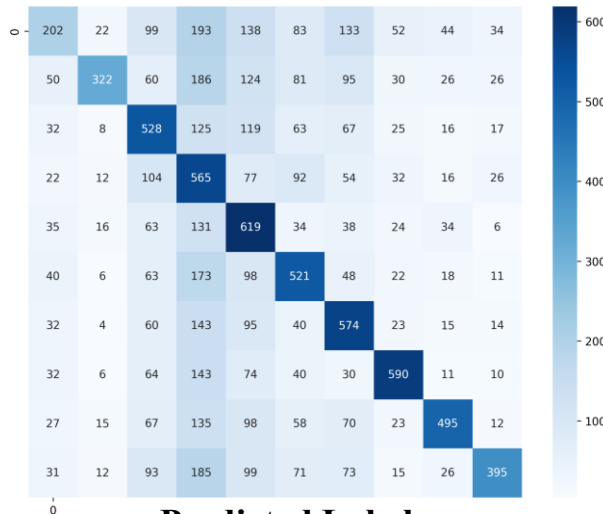

Predicted Label

(b)

True Label

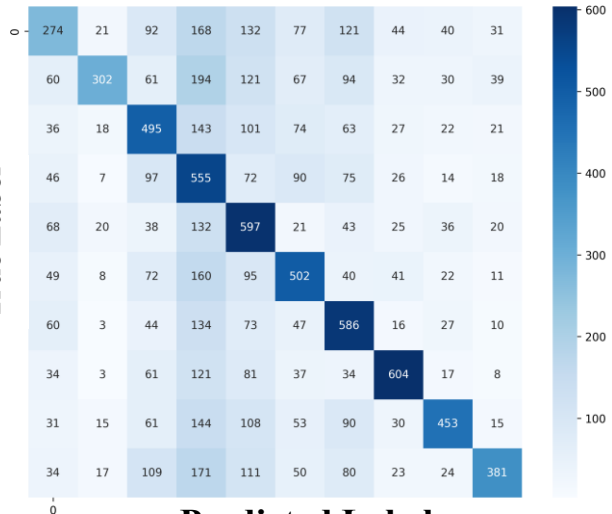

Predicted Label

(c)

Supplement: supplementary_material [file Figure9.pdf › img/Figure9.pdf]
